# Supplementary material
Source: publisher figshare collection journal article supplement (https://acs.figshare.com/ndownloader/files/5178388)
Supplement: Supplementary file 1 [file 5178388]

data_global

#============================================================================

# 1. SUBMISSION DETAILS

_publ_contact_author          # Name and address of author for correspondence
;
      Kenton H. Whitmire
      Department of Chemistry MS-60
      Rice University
      1600 Main St. 
      Houtson Tx. 77005
      United States of America
;
_publ_contact_author_phone        '713 737 5650'
_publ_contact_author_fax          '713 737 5652'
_publ_contact_author_email        whitmir@rice.edu

_publ_requested_journal           'Inorganic Chemistry'
_publ_requested_coeditor_name     ?

_publ_contact_letter
;
  Please consider this CIF file for publication as supporting information for a standard paper in Inorganic Chemistry.
;

#============================================================================

# 2. PROCESSING SUMMARY (IUCr Office Use Only)

_journal_date_recd_electronic     ?

_journal_date_to_coeditor         ?
_journal_date_from_coeditor       ?
_journal_date_accepted            ?

_journal_date_printers_first      ?
_journal_date_printers_final      ?
_journal_date_proofs_out          ?
_journal_date_proofs_in           ?

_journal_coeditor_name            ?
_journal_coeditor_code            ?
_journal_coeditor_notes
 ?

_journal_techeditor_code          ?
_journal_techeditor_notes
 ?

_journal_coden_ASTM               ?
_journal_name_full                ?
_journal_year                     ?
_journal_volume                   ?
_journal_issue                    ?
_journal_page_first               ?
_journal_page_last                ?

_journal_suppl_publ_number        ?
_journal_suppl_publ_pages         ?

#============================================================================

# 3. TITLE AND AUTHOR LIST

_publ_section_title
;
Toward a general strategy for the synthesis of heterobimetallic coordination
complexes as precursors to metal oxide materials:
Synthesis, characterization and thermal decomposition of Bi2(Hsal)6*M(acac)3
(M = Al, Co, V, Fe, Cr).

;

# The loop structure below should contain the names and addresses of all
# authors, in the required order of publication. Repeat as necessary.

loop_
 _publ_author_name
 _publ_author_address
     'Thurston, John H.'
;     Department of Chemistry MS-60
      Rice University
      1600 Main St. 
      Houtson Tx. 77005
      United States of America
;
     'Whitmire, Kenton H.'
;     Department of Chemistry MS-60
      Rice University
      1600 Main St. 
      Houtson Tx. 77005
      United States of America
;


#============================================================================
 
data_3

#====END

#data_Bi2Al(Hsal)6(acac)3 
 
 
_audit_creation_method            SHELXL-97 
_chemical_name_systematic 
; 
 ? 
; 
_chemical_name_common             ? 
_chemical_melting_point           ? 
_chemical_formula_moiety          ? 
_chemical_formula_sum 
 'C57 H51 Al Bi2 O24' 
_chemical_formula_weight          1564.92 
 
loop_ 
 _atom_type_symbol 
 _atom_type_description 
 _atom_type_scat_dispersion_real 
 _atom_type_scat_dispersion_imag 
 _atom_type_scat_source 
 'C'  'C'   0.0033   0.0016 
 'International Tables Vol C Tables 4.2.6.8 and 6.1.1.4' 
 'H'  'H'   0.0000   0.0000 
 'International Tables Vol C Tables 4.2.6.8 and 6.1.1.4' 
 'O'  'O'   0.0106   0.0060 
 'International Tables Vol C Tables 4.2.6.8 and 6.1.1.4' 
 'Al'  'Al'   0.0645   0.0514 
 'International Tables Vol C Tables 4.2.6.8 and 6.1.1.4' 
 'Bi'  'Bi'  -4.1077  10.2566 
 'International Tables Vol C Tables 4.2.6.8 and 6.1.1.4' 
 
_symmetry_cell_setting            'Hexagonal' 
_symmetry_space_group_name_H-M    'R-3' 
 
loop_ 
 _symmetry_equiv_pos_as_xyz 
 'x, y, z' 
 '-y, x-y, z' 
 '-x+y, -x, z' 
 'x+2/3, y+1/3, z+1/3' 
 '-y+2/3, x-y+1/3, z+1/3' 
 '-x+y+2/3, -x+1/3, z+1/3' 
 'x+1/3, y+2/3, z+2/3' 
 '-y+1/3, x-y+2/3, z+2/3' 
 '-x+y+1/3, -x+2/3, z+2/3' 
 '-x, -y, -z' 
 'y, -x+y, -z' 
 'x-y, x, -z' 
 '-x+2/3, -y+1/3, -z+1/3' 
 'y+2/3, -x+y+1/3, -z+1/3' 
 'x-y+2/3, x+1/3, -z+1/3' 
 '-x+1/3, -y+2/3, -z+2/3' 
 'y+1/3, -x+y+2/3, -z+2/3' 
 'x-y+1/3, x+2/3, -z+2/3' 
 
_cell_length_a                    19.391(3) 
_cell_length_b                    19.391(3) 
_cell_length_c                    26.708(5) 
_cell_angle_alpha                 90.00 
_cell_angle_beta                  90.00 
_cell_angle_gamma                 120.00 
_cell_volume                      8697(2) 
_cell_formula_units_Z             6 
_cell_measurement_temperature     293(2) 
_cell_measurement_reflns_used     4497 
_cell_measurement_theta_min       5.078      
_cell_measurement_theta_max       42.965  
 
_exptl_crystal_description        prism 
_exptl_crystal_colour             colorless 
_exptl_crystal_size_max           0.15 
_exptl_crystal_size_mid           0.15 
_exptl_crystal_size_min           0.10 
_exptl_crystal_density_meas       ? 
_exptl_crystal_density_diffrn     1.793 
_exptl_crystal_density_method     'not measured' 
_exptl_crystal_F_000              4584 
_exptl_absorpt_coefficient_mu     6.161 
_exptl_absorpt_correction_type    'multi-scan' 
_exptl_absorpt_correction_T_min   0.744261 
_exptl_absorpt_correction_T_max   1.000000 
_exptl_absorpt_process_details    'SADABS (Sheldrick, 1997)' 
 
_exptl_special_details 
; 
 ? 
; 
 
_diffrn_ambient_temperature       293(2) 
_diffrn_radiation_wavelength      0.71073 
_diffrn_radiation_type            MoK\a 
_diffrn_radiation_source          'normal-focus sealed tube' 
_diffrn_radiation_monochromator   graphite 
_diffrn_measurement_device_type   'Bruker SMART 1000, CCD' 
_diffrn_measurement_method        '2theta, omega' 
_diffrn_detector_area_resol_mean  ? 
_diffrn_standards_number          3 
_diffrn_standards_interval_count  150 
_diffrn_standards_interval_time   ? 
_diffrn_standards_decay_%         ? 
_diffrn_reflns_number             18526 
_diffrn_reflns_av_R_equivalents   0.1378 
_diffrn_reflns_av_sigmaI/netI     0.0704 
_diffrn_reflns_limit_h_min        -21 
_diffrn_reflns_limit_h_max        21 
_diffrn_reflns_limit_k_min        -21 
_diffrn_reflns_limit_k_max        21 
_diffrn_reflns_limit_l_min        -29 
_diffrn_reflns_limit_l_max        29 
_diffrn_reflns_theta_min          1.43 
_diffrn_reflns_theta_max          23.37 
_reflns_number_total              2802 
_reflns_number_gt                 2180 
_reflns_threshold_expression      >2sigma(I) 
 
_computing_data_collection        'SHELXTL 6.10 (Bruker AXS, 2001)' 
_computing_cell_refinement        'SHELXTL 6.10 (Bruker AXS, 2001)' 
_computing_data_reduction         'SHELXTL 6.10 (Bruker AXS, 2001)' 
_computing_structure_solution     'SHELXS-97 (Sheldrick, 1990)' 
_computing_structure_refinement   'SHELXL-97 (Sheldrick, 1997)' 
_computing_molecular_graphics     'SHELXTL 6.10 (Bruker AXS, 2001)' 
_computing_publication_material   'SHELXTL 6.10 (Bruker AXS, 2001)' 
 
_refine_special_details 
; 
 Refinement of F^2^ against ALL reflections.  The weighted R-factor wR and 
 goodness of fit S are based on F^2^, conventional R-factors R are based 
 on F, with F set to zero for negative F^2^. The threshold expression of 
 F^2^ > 2sigma(F^2^) is used only for calculating R-factors(gt) etc. and is 
 not relevant to the choice of reflections for refinement.  R-factors based 
 on F^2^ are statistically about twice as large as those based on F, and R- 
 factors based on ALL data will be even larger. 
; 
 
_refine_ls_structure_factor_coef  Fsqd  
_refine_ls_matrix_type            full 
_refine_ls_weighting_scheme       calc  
_refine_ls_weighting_details 
 'calc w=1/[\s^2^(Fo^2^)+(0.1241P)^2^+1790.3823P] where P=(Fo^2^+2Fc^2^)/3' 
_atom_sites_solution_primary      direct 
_atom_sites_solution_secondary    difmap 
_atom_sites_solution_hydrogens    geom 
_refine_ls_hydrogen_treatment     'riding model' 
_refine_ls_extinction_method      none 
_refine_ls_extinction_coef        ? 
_refine_ls_number_reflns          2802 
_refine_ls_number_parameters      225 
_refine_ls_number_restraints      0 
_refine_ls_R_factor_all           0.1302 
_refine_ls_R_factor_gt            0.1058 
_refine_ls_wR_factor_ref          0.3234 
_refine_ls_wR_factor_gt           0.3079 
_refine_ls_goodness_of_fit_ref    1.149 
_refine_ls_restrained_S_all       1.149 
_refine_ls_shift/su_max           0.000 
_refine_ls_shift/su_mean          0.000 
 
loop_ 
 _atom_site_label 
 _atom_site_type_symbol 
 _atom_site_fract_x 
 _atom_site_fract_y 
 _atom_site_fract_z 
 _atom_site_U_iso_or_equiv 
 _atom_site_adp_type 
 _atom_site_occupancy 
 _atom_site_symmetry_multiplicity 
 _atom_site_calc_flag 
 _atom_site_refinement_flags 
 _atom_site_disorder_assembly 
 _atom_site_disorder_group 
Bi1 Bi 0.0000 0.0000 -0.25579(5) 0.0282(5) Uani 1 3 d S . . 
Bi2 Bi 0.0000 0.0000 -0.10650(9) 0.0711(8) Uani 1 3 d S . . 
Al1 Al 0.0000 0.0000 -0.3871(5) 0.029(3) Uani 1 3 d S . . 
O1 O -0.0814(9) -0.0098(9) -0.3429(6) 0.029(4) Uani 1 1 d . . . 
O2 O -0.0141(11) 0.0705(10) -0.4258(7) 0.041(4) Uani 1 1 d . . . 
O12 O -0.1136(11) -0.1435(11) -0.2496(7) 0.045(5) Uani 1 1 d . . . 
O13 O -0.1028(10) -0.0527(12) -0.1967(7) 0.043(4) Uani 1 1 d . . . 
O11 O -0.2271(14) -0.2886(12) -0.2400(10) 0.068(7) Uani 1 1 d . . . 
H11A H -0.1871 -0.2519 -0.2528 0.102 Uiso 1 1 calc R . . 
O21 O 0.302(2) 0.172(2) -0.1154(13) 0.113(11) Uiso 1 1 d . . . 
H21A H 0.2560 0.1596 -0.1227 0.169 Uiso 1 1 calc R . . 
O23 O 0.0935(16) 0.0036(18) -0.0545(9) 0.076(7) Uani 1 1 d . . . 
O22 O 0.1526(18) 0.1005(16) -0.1089(11) 0.082(8) Uani 1 1 d . . . 
C1 C -0.1973(17) -0.012(2) -0.3122(11) 0.052(8) Uani 1 1 d . . . 
H1A H -0.1885 -0.0390 -0.2849 0.078 Uiso 1 1 calc R . . 
H1B H -0.2481 -0.0468 -0.3273 0.078 Uiso 1 1 calc R . . 
H1C H -0.1966 0.0348 -0.2999 0.078 Uiso 1 1 calc R . . 
C2 C -0.1328(15) 0.0112(17) -0.3505(9) 0.037(6) Uani 1 1 d . . . 
C3 C -0.1309(16) 0.0550(16) -0.3922(11) 0.042(7) Uani 1 1 d . . . 
H3A H -0.1718 0.0663 -0.3966 0.050 Uiso 1 1 calc R . . 
C4 C -0.072(2) 0.0820(18) -0.4268(12) 0.053(8) Uani 1 1 d . . . 
C5 C -0.070(2) 0.1335(18) -0.4693(13) 0.064(10) Uani 1 1 d . . . 
H5A H -0.0245 0.1468 -0.4902 0.095 Uiso 1 1 calc R . . 
H5B H -0.0659 0.1814 -0.4562 0.095 Uiso 1 1 calc R . . 
H5C H -0.1176 0.1052 -0.4886 0.095 Uiso 1 1 calc R . . 
C11 C -0.2499(11) -0.2612(10) -0.2016(7) 0.054(8) Uani 1 1 d G . . 
C12 C -0.3173(11) -0.3173(9) -0.1762(9) 0.074(12) Uani 1 1 d G . . 
H12A H -0.3435 -0.3702 -0.1865 0.088 Uiso 1 1 calc R . . 
C13 C -0.3455(10) -0.2942(13) -0.1354(9) 0.073(11) Uani 1 1 d G . . 
H13A H -0.3907 -0.3317 -0.1183 0.088 Uiso 1 1 calc R . . 
C14 C -0.3063(12) -0.2152(14) -0.1200(7) 0.079(13) Uani 1 1 d G . . 
H14A H -0.3252 -0.1998 -0.0927 0.095 Uiso 1 1 calc R . . 
C15 C -0.2389(11) -0.1591(10) -0.1454(7) 0.051(8) Uani 1 1 d G . . 
H15A H -0.2126 -0.1062 -0.1351 0.061 Uiso 1 1 calc R . . 
C16 C -0.2106(9) -0.1821(9) -0.1862(6) 0.036(6) Uani 1 1 d G . . 
C17 C -0.1376(14) -0.1233(14) -0.2116(9) 0.032(6) Uani 1 1 d . . . 
C21 C 0.3015(16) 0.1322(13) -0.0760(8) 0.072(11) Uani 1 1 d G . . 
C22 C 0.3745(12) 0.1466(14) -0.0575(11) 0.083(13) Uani 1 1 d G . . 
H22A H 0.4215 0.1842 -0.0728 0.100 Uiso 1 1 calc R . . 
C23 C 0.3773(13) 0.1048(18) -0.0160(11) 0.096(14) Uani 1 1 d G . . 
H23A H 0.4262 0.1144 -0.0036 0.115 Uiso 1 1 calc R . . 
C24 C 0.3071(18) 0.0486(17) 0.0070(9) 0.092(14) Uani 1 1 d G . . 
H24A H 0.3090 0.0206 0.0347 0.111 Uiso 1 1 calc R . . 
C25 C 0.2341(13) 0.0342(14) -0.0116(9) 0.081(12) Uani 1 1 d G . . 
H25A H 0.1872 -0.0034 0.0038 0.097 Uiso 1 1 calc R . . 
C26 C 0.2313(11) 0.0760(14) -0.0531(9) 0.066(10) Uani 1 1 d G . . 
C27 C 0.153(3) 0.059(2) -0.0715(15) 0.076(12) Uani 1 1 d . . . 
 
loop_ 
 _atom_site_aniso_label 
 _atom_site_aniso_U_11 
 _atom_site_aniso_U_22 
 _atom_site_aniso_U_33 
 _atom_site_aniso_U_23 
 _atom_site_aniso_U_13 
 _atom_site_aniso_U_12 
Bi1 0.0310(6) 0.0310(6) 0.0227(8) 0.000 0.000 0.0155(3) 
Bi2 0.0747(11) 0.0747(11) 0.0640(15) 0.000 0.000 0.0373(6) 
Al1 0.024(4) 0.024(4) 0.040(7) 0.000 0.000 0.0119(19) 
O1 0.029(9) 0.032(9) 0.028(9) -0.002(7) -0.005(7) 0.017(8) 
O2 0.048(12) 0.037(10) 0.040(10) -0.003(8) -0.002(8) 0.022(9) 
O12 0.044(11) 0.036(11) 0.047(11) -0.006(8) 0.005(9) 0.014(9) 
O13 0.029(9) 0.050(13) 0.050(11) -0.005(9) 0.002(8) 0.018(9) 
O11 0.061(14) 0.035(12) 0.091(18) -0.001(11) 0.021(13) 0.011(11) 
O23 0.074(18) 0.10(2) 0.067(16) 0.003(15) -0.009(13) 0.057(18) 
O22 0.10(2) 0.072(17) 0.09(2) -0.003(15) -0.021(16) 0.059(17) 
C1 0.030(15) 0.06(2) 0.055(18) -0.005(15) 0.003(13) 0.016(14) 
C2 0.027(13) 0.054(17) 0.032(13) -0.019(12) -0.013(10) 0.022(13) 
C3 0.031(15) 0.045(16) 0.064(18) 0.009(14) 0.006(13) 0.029(13) 
C4 0.05(2) 0.038(17) 0.063(19) -0.007(14) -0.024(16) 0.021(15) 
C5 0.09(3) 0.035(17) 0.07(2) 0.016(15) -0.017(18) 0.029(17) 
C11 0.046(18) 0.05(2) 0.052(18) 0.012(15) -0.006(14) 0.018(16) 
C12 0.036(18) 0.035(18) 0.13(3) 0.03(2) -0.01(2) 0.003(15) 
C13 0.07(2) 0.07(3) 0.06(2) 0.021(19) 0.018(19) 0.02(2) 
C14 0.033(18) 0.13(4) 0.09(3) 0.04(3) 0.026(18) 0.05(2) 
C15 0.06(2) 0.050(18) 0.056(18) 0.023(14) 0.017(15) 0.039(16) 
C16 0.042(15) 0.035(15) 0.041(15) 0.008(11) -0.002(12) 0.026(13) 
C17 0.022(12) 0.026(14) 0.040(15) 0.011(11) -0.001(11) 0.007(11) 
C21 0.13(4) 0.05(2) 0.050(19) -0.007(16) 0.00(2) 0.06(2) 
C22 0.022(17) 0.08(3) 0.13(4) -0.03(3) 0.013(19) 0.013(17) 
C23 0.10(4) 0.11(4) 0.10(4) -0.03(3) -0.02(3) 0.07(3) 
C24 0.08(3) 0.09(3) 0.11(3) 0.03(3) -0.01(3) 0.03(3) 
C25 0.08(3) 0.08(3) 0.07(3) -0.01(2) 0.00(2) 0.02(2) 
C26 0.06(2) 0.05(2) 0.09(3) -0.022(19) -0.012(19) 0.024(18) 
C27 0.08(3) 0.032(18) 0.08(3) -0.004(17) 0.03(2) 0.006(19) 
 
_geom_special_details 
; 
 All esds (except the esd in the dihedral angle between two l.s. planes) 
 are estimated using the full covariance matrix.  The cell esds are taken 
 into account individually in the estimation of esds in distances, angles 
 and torsion angles; correlations between esds in cell parameters are only 
 used when they are defined by crystal symmetry.  An approximate (isotropic) 
 treatment of cell esds is used for estimating esds involving l.s. planes. 
; 
 
loop_ 
 _geom_bond_atom_site_label_1 
 _geom_bond_atom_site_label_2 
 _geom_bond_distance 
 _geom_bond_site_symmetry_2 
 _geom_bond_publ_flag 
Bi1 O13 2.339(17) 3 ? 
Bi1 O13 2.339(17) . ? 
Bi1 O13 2.339(17) 2 ? 
Bi1 O12 2.548(18) . ? 
Bi1 O12 2.548(18) 2 ? 
Bi1 O12 2.548(18) 3 ? 
Bi1 O1 2.765(15) . ? 
Bi1 C17 2.80(2) 3 ? 
Bi1 C17 2.80(2) . ? 
Bi1 C17 2.80(2) 2 ? 
Bi2 O23 2.26(2) . ? 
Bi2 O23 2.26(2) 2 ? 
Bi2 O23 2.26(2) 3 ? 
Bi2 O22 2.61(3) . ? 
Bi2 O22 2.61(3) 3 ? 
Bi2 O22 2.61(3) 2 ? 
Bi2 C27 2.76(5) . ? 
Bi2 C27 2.76(5) 3 ? 
Bi2 C27 2.76(5) 2 ? 
Bi2 O13 2.963(18) . ? 
Al1 O2 1.840(19) 2 ? 
Al1 O2 1.840(19) 3 ? 
Al1 O2 1.840(19) . ? 
Al1 O1 1.902(17) 3 ? 
Al1 O1 1.902(17) . ? 
Al1 O1 1.902(17) 2 ? 
O1 C2 1.27(3) . ? 
O2 C4 1.24(3) . ? 
O12 C17 1.26(3) . ? 
O13 C17 1.25(3) . ? 
O11 C11 1.33(3) . ? 
O21 C21 1.30(4) . ? 
O23 C27 1.20(4) . ? 
O22 C27 1.29(5) . ? 
C1 C2 1.50(4) . ? 
C2 C3 1.39(4) . ? 
C3 C4 1.36(4) . ? 
C4 C5 1.50(4) . ? 
C11 C12 1.3900 . ? 
C11 C16 1.3900 . ? 
C12 C13 1.3900 . ? 
C13 C14 1.3900 . ? 
C14 C15 1.3900 . ? 
C15 C16 1.3900 . ? 
C16 C17 1.47(3) . ? 
C21 C22 1.3900 . ? 
C21 C26 1.3900 . ? 
C22 C23 1.3900 . ? 
C23 C24 1.3900 . ? 
C24 C25 1.3900 . ? 
C25 C26 1.3900 . ? 
C26 C27 1.46(5) . ? 
 
loop_ 
 _geom_angle_atom_site_label_1 
 _geom_angle_atom_site_label_2 
 _geom_angle_atom_site_label_3 
 _geom_angle 
 _geom_angle_site_symmetry_1 
 _geom_angle_site_symmetry_3 
 _geom_angle_publ_flag 
O13 Bi1 O13 79.4(7) 3 . ? 
O13 Bi1 O13 79.4(7) 3 2 ? 
O13 Bi1 O13 79.4(7) . 2 ? 
O13 Bi1 O12 130.6(6) 3 . ? 
O13 Bi1 O12 52.9(6) . . ? 
O13 Bi1 O12 79.7(7) 2 . ? 
O13 Bi1 O12 79.7(7) 3 2 ? 
O13 Bi1 O12 130.6(6) . 2 ? 
O13 Bi1 O12 52.9(6) 2 2 ? 
O12 Bi1 O12 119.58(10) . 2 ? 
O13 Bi1 O12 52.9(6) 3 3 ? 
O13 Bi1 O12 79.7(7) . 3 ? 
O13 Bi1 O12 130.6(6) 2 3 ? 
O12 Bi1 O12 119.58(10) . 3 ? 
O12 Bi1 O12 119.58(10) 2 3 ? 
O13 Bi1 O1 127.3(6) 3 . ? 
O13 Bi1 O1 101.9(6) . . ? 
O13 Bi1 O1 153.2(6) 2 . ? 
O12 Bi1 O1 80.1(5) . . ? 
O12 Bi1 O1 126.2(5) 2 . ? 
O12 Bi1 O1 75.2(5) 3 . ? 
O13 Bi1 C17 26.2(7) 3 3 ? 
O13 Bi1 C17 77.8(7) . 3 ? 
O13 Bi1 C17 104.8(7) 2 3 ? 
O12 Bi1 C17 129.3(6) . 3 ? 
O12 Bi1 C17 100.3(7) 2 3 ? 
O12 Bi1 C17 26.7(7) 3 3 ? 
O1 Bi1 C17 101.6(6) . 3 ? 
O13 Bi1 C17 104.8(7) 3 . ? 
O13 Bi1 C17 26.2(7) . . ? 
O13 Bi1 C17 77.8(7) 2 . ? 
O12 Bi1 C17 26.7(7) . . ? 
O12 Bi1 C17 129.3(6) 2 . ? 
O12 Bi1 C17 100.3(7) 3 . ? 
O1 Bi1 C17 91.6(6) . . ? 
C17 Bi1 C17 103.6(6) 3 . ? 
O13 Bi1 C17 77.8(7) 3 2 ? 
O13 Bi1 C17 104.8(7) . 2 ? 
O13 Bi1 C17 26.2(7) 2 2 ? 
O12 Bi1 C17 100.3(7) . 2 ? 
O12 Bi1 C17 26.7(7) 2 2 ? 
O12 Bi1 C17 129.3(6) 3 2 ? 
O1 Bi1 C17 146.5(6) . 2 ? 
C17 Bi1 C17 103.6(6) 3 2 ? 
C17 Bi1 C17 103.6(6) . 2 ? 
O23 Bi2 O23 86.1(10) . 2 ? 
O23 Bi2 O23 86.1(10) . 3 ? 
O23 Bi2 O23 86.1(10) 2 3 ? 
O23 Bi2 O22 53.0(9) . . ? 
O23 Bi2 O22 84.2(10) 2 . ? 
O23 Bi2 O22 138.4(9) 3 . ? 
O23 Bi2 O22 84.2(10) . 3 ? 
O23 Bi2 O22 138.4(9) 2 3 ? 
O23 Bi2 O22 53.0(9) 3 3 ? 
O22 Bi2 O22 119.94(5) . 3 ? 
O23 Bi2 O22 138.4(9) . 2 ? 
O23 Bi2 O22 53.0(9) 2 2 ? 
O23 Bi2 O22 84.2(10) 3 2 ? 
O22 Bi2 O22 119.94(5) . 2 ? 
O22 Bi2 O22 119.94(6) 3 2 ? 
O23 Bi2 C27 25.3(10) . . ? 
O23 Bi2 C27 85.2(11) 2 . ? 
O23 Bi2 C27 111.2(10) 3 . ? 
O22 Bi2 C27 27.6(9) . . ? 
O22 Bi2 C27 101.7(9) 3 . ? 
O22 Bi2 C27 135.1(9) 2 . ? 
O23 Bi2 C27 85.2(11) . 3 ? 
O23 Bi2 C27 111.2(10) 2 3 ? 
O23 Bi2 C27 25.3(10) 3 3 ? 
O22 Bi2 C27 135.1(9) . 3 ? 
O22 Bi2 C27 27.6(9) 3 3 ? 
O22 Bi2 C27 101.7(9) 2 3 ? 
C27 Bi2 C27 109.1(8) . 3 ? 
O23 Bi2 C27 111.2(10) . 2 ? 
O23 Bi2 C27 25.3(10) 2 2 ? 
O23 Bi2 C27 85.2(11) 3 2 ? 
O22 Bi2 C27 101.7(9) . 2 ? 
O22 Bi2 C27 135.1(9) 3 2 ? 
O22 Bi2 C27 27.6(9) 2 2 ? 
C27 Bi2 C27 109.1(8) . 2 ? 
C27 Bi2 C27 109.1(8) 3 2 ? 
O23 Bi2 O13 154.4(8) . . ? 
O23 Bi2 O13 119.4(8) 2 . ? 
O23 Bi2 O13 96.1(8) 3 . ? 
O22 Bi2 O13 123.7(7) . . ? 
O22 Bi2 O13 77.1(7) 3 . ? 
O22 Bi2 O13 67.0(7) 2 . ? 
C27 Bi2 O13 144.8(9) . . ? 
C27 Bi2 O13 86.2(8) 3 . ? 
C27 Bi2 O13 94.3(9) 2 . ? 
O2 Al1 O2 91.5(9) 2 3 ? 
O2 Al1 O2 91.5(9) 2 . ? 
O2 Al1 O2 91.5(9) 3 . ? 
O2 Al1 O1 175.4(9) 2 3 ? 
O2 Al1 O1 89.9(7) 3 3 ? 
O2 Al1 O1 92.9(7) . 3 ? 
O2 Al1 O1 92.9(7) 2 . ? 
O2 Al1 O1 175.4(9) 3 . ? 
O2 Al1 O1 89.9(7) . . ? 
O1 Al1 O1 85.6(8) 3 . ? 
O2 Al1 O1 89.9(7) 2 2 ? 
O2 Al1 O1 92.9(7) 3 2 ? 
O2 Al1 O1 175.4(9) . 2 ? 
O1 Al1 O1 85.6(8) 3 2 ? 
O1 Al1 O1 85.6(8) . 2 ? 
C2 O1 Al1 128.0(16) . . ? 
C2 O1 Bi1 128.8(14) . . ? 
Al1 O1 Bi1 95.6(7) . . ? 
C4 O2 Al1 129(2) . . ? 
C17 O12 Bi1 88.0(14) . . ? 
C17 O13 Bi1 98.0(15) . . ? 
C17 O13 Bi2 122.7(16) . . ? 
Bi1 O13 Bi2 96.8(6) . . ? 
C27 O23 Bi2 101(3) . . ? 
C27 O22 Bi2 83(2) . . ? 
O1 C2 C3 123(2) . . ? 
O1 C2 C1 118(2) . . ? 
C3 C2 C1 120(2) . . ? 
C4 C3 C2 123(2) . . ? 
O2 C4 C3 125(3) . . ? 
O2 C4 C5 114(3) . . ? 
C3 C4 C5 120(3) . . ? 
O11 C11 C12 115.8(16) . . ? 
O11 C11 C16 124.2(16) . . ? 
C12 C11 C16 120.0 . . ? 
C13 C12 C11 120.0 . . ? 
C12 C13 C14 120.0 . . ? 
C15 C14 C13 120.0 . . ? 
C16 C15 C14 120.0 . . ? 
C15 C16 C11 120.0 . . ? 
C15 C16 C17 119.7(15) . . ? 
C11 C16 C17 120.3(15) . . ? 
O13 C17 O12 121(2) . . ? 
O13 C17 C16 119(2) . . ? 
O12 C17 C16 120(2) . . ? 
O13 C17 Bi1 55.8(12) . . ? 
O12 C17 Bi1 65.4(13) . . ? 
C16 C17 Bi1 174.7(18) . . ? 
O21 C21 C22 118(3) . . ? 
O21 C21 C26 122(3) . . ? 
C22 C21 C26 120.0 . . ? 
C21 C22 C23 120.0 . . ? 
C22 C23 C24 120.0 . . ? 
C25 C24 C23 120.0 . . ? 
C24 C25 C26 120.0 . . ? 
C25 C26 C21 120.0 . . ? 
C25 C26 C27 118(2) . . ? 
C21 C26 C27 122(2) . . ? 
O23 C27 O22 123(4) . . ? 
O23 C27 C26 120(4) . . ? 
O22 C27 C26 117(3) . . ? 
O23 C27 Bi2 53(2) . . ? 
O22 C27 Bi2 70(2) . . ? 
C26 C27 Bi2 170(2) . . ? 
 
_diffrn_measured_fraction_theta_max    0.991 
_diffrn_reflns_theta_full              23.37 
_diffrn_measured_fraction_theta_full   0.991 
_refine_diff_density_max    3.804 
_refine_diff_density_min   -5.832 
_refine_diff_density_rms    0.353 

#====END

 # End of Crystallographic Information File
